# Supplementary material
Source: PubMed Central journal article supplement (PMC1533970)
Supplement: plntcell_tpc.106.042614_1.pdf [file plntcell_tpc.106.042614_1.pdf]

Supplementary Data

Table 1. Accession names and locations.

| Accession | Latitude | Longitude | Regional group <sup>a</sup> | Population <sup>b</sup> |
|-----------|----------|-----------|-----------------------------|-------------------------|
| Ag-0      | 45       | 1.3       | 1                           | 0                       |
| An-1      | 51.3     | 4.3       | 6                           | 0                       |
| Bay-0     | 49       | 11        | 5                           | 0                       |
| Bil-5     | 62.38    | 17.56     | 3                           | 1                       |
| Bil-7     | 62.38    | 17.56     | 3                           | 1                       |
| Bor-1     | 49.12    | 16.37     | 5                           | 2                       |
| Bor-4     | 49.12    | 16.37     | 5                           | 2                       |
| Br-0      | 49       | 16.3      | 8                           | 0                       |
| Bur-0     | 53.3     | -8        | 3                           | 0                       |
| C24       | 40.12    | -8.42     | 8                           | 0                       |
| CIBC-17   | 51.25    | 0.41      | 6                           | 3                       |
| CIBC-5    | 51.25    | 0.41      | 1                           | 3                       |
| Col-0     | 38.3     | -92.3     | 6                           | 0                       |
| CS22491   | 61.36    | 34.15     | 4                           | 0                       |
| Ct-1      | 37.3     | 15        | 5                           | 0                       |
| Cvi-0     | 16       | -24       | 8                           | 0                       |
| Eden-1    | 62.38    | 17.56     | 3                           | 4                       |
| Eden-2    | 62.38    | 17.56     | 3                           | 4                       |
| Edi-0     | 56       | -3.18     | 6                           | 0                       |
| Ei-2      | 50.3     | 6.3       | 6                           | 0                       |
| Est-1     | 58.3     | 25.3      | 5                           | 0                       |
| Fab-2     | 62.38    | 17.56     | 3                           | 5                       |
| Fab-4     | 62.38    | 17.56     | 3                           | 5                       |
| Fei-0     | 40.55    | -8.54     | 1                           | 0                       |
| Ga-0      | 50.3     | 8         | 5                           | 0                       |
| GOT-22    | 51.32    | 9.55      | 6                           | 6                       |
| GOT-7     | 51.32    | 9.55      | 6                           | 6                       |
| Gu-0      | 50.3     | 8         | 6                           | 0                       |
| Gy-0      | 49       | 2         | 1                           | 0                       |

---

|         |       |        |   |    |
|---------|-------|--------|---|----|
| HR-10   | 51.25 | 0.41   | 1 | 7  |
| HR-5    | 51.25 | 0.41   | 1 | 7  |
| Kas-1   | 35    | 77     | 4 | 0  |
| Kin-0   | 44.46 | -85.37 | 1 | 0  |
| KNO-10  | 41.18 | -86.38 | 2 | 8  |
| KNO-18  | 41.18 | -86.38 | 2 | 8  |
| Kondara | 38.35 | 68.48  | 4 | 0  |
| KZ-1    | 49.5  | 73.1   | 4 | 9  |
| KZ-9    | 49.5  | 73.1   | 4 | 9  |
| Ler-1   | 51.31 | 12.1   | 8 | 0  |
| LL-0    | 41.59 | 2.49   | 7 | 0  |
| Lov-1   | 62.48 | 18.04  | 3 | 10 |
| Lov-5   | 62.48 | 18.04  | 3 | 10 |
| LP2-2   | 49.22 | 16.39  | 5 | 11 |
| LP2-6   | 49.22 | 16.39  | 5 | 11 |
| Lz-0    | 46    | 3.3    | 1 | 0  |
| Mr-0    | 44.3  | 9.3    | 8 | 0  |
| Mrk-0   | 49    | 9.3    | 6 | 0  |
| Ms-0    | 56    | 38     | 4 | 0  |
| Mt-0    | 33    | 23     | 6 | 0  |
| Mz-0    | 50.3  | 8.3    | 6 | 0  |
| Nd-1    | 50.27 | 7.13   | 6 | 0  |
| NFA-10  | 51.25 | 0.41   | 1 | 12 |
| NFA-8   | 51.25 | 0.41   | 1 | 12 |
| Nok-3   | 52.3  | 4      | 6 | 0  |
| Omo-2-1 | 56.12 | 15.18  | 6 | 13 |
| Omo-2-3 | 56.12 | 15.18  | 6 | 13 |
| Oy-0    | 60.23 | 6.13   | 6 | 0  |
| PNA-10  | 42.07 | -86.27 | 2 | 14 |
| PNA-17  | 42.07 | -86.27 | 2 | 14 |
| Pro-0   | 43.15 | -6.02  | 1 | 0  |
| Pu2-23  | 42.38 | 18.07  | 5 | 15 |

---

---

|            |       |        |      |    |
|------------|-------|--------|------|----|
| Pu2-7      | 42.38 | 18.07  | 5    | 15 |
| Ra-0       | 46    | 3.3    | 1    | 0  |
| REN-1      | 48.5  | -1.41  | 1    | 16 |
| REN-11     | 48.5  | -1.41  | 1    | 16 |
| RMX-A02    | 42.07 | -86.29 | 2    | 17 |
| RMX-A180   | 42.07 | -86.29 | 1    | 17 |
| RRS-10     | 41.32 | -86.26 | 2    | 18 |
| RRS-7      | 41.32 | -86.26 | 6    | 18 |
| Se-0       | 38.35 | 68.48  | 7    | 0  |
| Shakh dara | 41.3  | 2.3    | 4    | 0  |
| Sorbo      | 38.35 | 68.48  | 4    | 0  |
| Spr-1-2    | 56.32 | 14.29  | 6    | 19 |
| Spr-1-6    | 56.32 | 14.29  | 6    | 19 |
| SQ-1       | 51.25 | 0.41   | 1    | 20 |
| SQ-8       | 51.25 | 0.41   | 1    | 20 |
| TAMM-2     | 59.58 | 23.26  | 3    | 21 |
| TAMM-27    | 59.58 | 23.26  | 3    | 21 |
| Ts-1       | 41.3  | 3      | 7    | 0  |
| Ts-5       | 41.3  | 3      | 7    | 0  |
| Tsu-1      | 34.43 | 136.31 | 5    | 0  |
| Ull-2-3    | 56.09 | 13.46  | 6    | 22 |
| Ull-2-5    | 56.09 | 13.46  | 5    | 22 |
| Uod-1      | 48.07 | 14.53  | 5    | 23 |
| Uod-7      | 48.07 | 14.53  | 5    | 23 |
| Van-0      | 49.30 | -123.0 | n.a. | 0  |
| Var-2-1    | 55.33 | 14.2   | 6    | 24 |
| Var-2-6    | 55.33 | 14.2   | 3    | 24 |
| Wa-1       | 52.3  | 21     | 8    | 0  |
| Wei-0      | 47.25 | 8.26   | 6    | 0  |
| Ws-0       | 52.3  | 30     | 5    | 0  |
| Ws-2       | 52.3  | 30     | 5    | 0  |
| Wt-5       | 52.3  | 9.3    | 6    | 0  |

---

---

|       |       |         |   |    |
|-------|-------|---------|---|----|
| Yo-0  | 37.45 | -119.35 | 2 | 0  |
| Zdr-1 | 49.12 | 16.37   | 5 | 25 |
| Zdr-6 | 49.12 | 16.37   | 5 | 25 |

---

<sup>a</sup>Accessions that are part of the same region are marked with an identical number. Regional groups were defined by Nordborg *et al.* (2005).

<sup>b</sup>Accessions that are part of the same population are indicated with an identical number. Accessions that were not sampled from local populations are marked with a zero.
