# Supplementary material
Source: PubMed Central journal article supplement (PMC1533970)
Supplement: plntcell_tpc.106.042614_2.pdf [file plntcell_tpc.106.042614_2.pdf]

## Supplementary Data

Table 2. Primer information for the amplification of *A. thaliana* LRR region fragments.

| Name      | Fragment <sup>a</sup> | Forward primer (5' to 3') | Reverse primer (5' to 3') |
|-----------|-----------------------|---------------------------|---------------------------|
| At1g12290 | 1                     | GACATGGAAAAGGCAAAGGA      | TGCCTTGAGAGTGTTTCAGG      |
|           | 2                     | CTGACTGATTCTTCGTCGAG      | GCCCTGTGGATAGCATCTG       |
| At1g17600 | 1                     | GATCTCTGATGCTTGATGGC      | CAGACGCAAAGTGAAAATG       |
|           | 2                     | AACCGGGAAAGGCTACTCAT      | ATTGGGATGCATTTCCATTG      |
|           | 3                     | AACCGCAGGGCACTTCTAC       | TTATCCATGGAGGCCAGTGT      |
| At1g27170 | 1                     | TGGAATGACAGGGAACATCA      | TCATCCACCTGAAAGAAACAGA    |
|           | 2                     | TGGTTGCCACAGCTTAGAAG      | GAACTCGGAACCTGTTTCAG      |
|           | 3                     | GGTACGCTGCACATCCCT        | CCGAAACTTTCTGGCAACTC      |
|           | 4                     | TGCTCAAGAGGCTTCCTG        | CTGCAAGGGAGTAGTTGGAG      |
| At1g33560 | 1                     | TCTCTTCGGACAACACTACGTC    | CCTTCTTGACCATTGCCAC       |
| At1g53350 | 1                     | CGAGGAAAAGTTTTGGAAGC      | GAATCGGCATTGGATCT         |
|           | 2                     | GGACAACACTCAGCCAATGA      | AACCGATCAGCAACACCTAAG     |
| At1g56540 | 1                     | TGGATTTTCTTCCTCGCCTA      | CAGTCGTAAGCATCCCATCA      |
|           | 2                     | CATGAATGCGTTGCTTTGTT      | CGCTTGTCGATCCAATTTGA      |
| At1g59620 | 1                     | CTTGTCGTAAAAGGGGGTGA      | ATGGGAGCATAACATCGGGTA     |
|           | 2                     | TGGAAAATTTCTCAACAGAGCA    | CGAGTCGCTTGGTAACACAT      |
| At1g59780 | 1                     | AGCCTCACAATCCAACACTGAGA   | CTTCCGAGAATTCCGTTTCAG     |
|           | 2                     | AGGAAAATGTTGCACATCAGG     | TTCTAGCAGATCACGTAGACTCG   |
| At1g63730 | 1                     | GGTTTTTCCACCTCAACTAA      | GCACCTCTTCCCTCTAGATA      |
|           | 2                     | GCATTCAGCCCCTTAC          | CCTACGTGCTTCTTGACCCA      |
| At1g63740 | 1                     | TCCCACATCGTCTAAGGTCT      | GGGAGATCTTTGATGCAATC      |
|           | 2                     | TGTGGGTCCTTGAGATTGAA      | CCCTTCCTGGTAAGTATGC       |
| At1g63750 | 1                     | TCTTCCCTCGGTTGT           | AATTTAAAGCAATTGGTGAA      |
| At1g64070 | 1                     | GAACAAGAGGGTTGGTTTCT      | TTGGTGAAATTTAGCTGTCC      |
| At1g65850 | 1                     | TGCACCTTTTACGCTTCA        | CGTTAAAGTACATCGTCGTG      |
| At2g16870 | 1                     | CGCACTTGGAGTGTTTAAAGG     | TCTTGTCGAACTCAATATGAAAGAT |
| At3g46530 | 1                     | AACCAAAGACAAAGAAAAGATGC   | CGAGTGCTTGATTTTCGGAAG     |
| At3g50950 | 1                     | GCCTCAACTGTCTGCACCTT      | TGGAGGAGTAAGGGCGTCTA      |

---

|           |   |                        |                        |
|-----------|---|------------------------|------------------------|
|           | 2 | TCGTGAAGCTCGAAGTTCTG   | ATCCAAACGGTCAAAGCAAC   |
| At4g14370 | 1 | TGGTGAAATTTAGGTCCACAAA | AGCCTTGGAACGTCACATC    |
| At4g14610 | 1 | TTTGCAGGTAGCCAAAAACC   | GATGTGAACTCAGCGAAGGAG  |
|           | 2 | AGCTCCTTCGCTGAGTTCAC   | TGAAAATGCATGACGTGGTT   |
| At4g26090 | 1 | TTGAGCCTAGCATGGGACAT   | GACGGATGGACTCTCGTGTT   |
| At4g33300 | 1 | AGCCAGTCTAGGCTGAAGCA   | AACCACCCCCTTGAAAAATC   |
|           | 2 | GCAGCTAAGGGAGGTCAGTC   | TGAGCATTACATTGCCCAGA   |
| At5g04720 | 1 | TGTAGCCACTTTCAACGGTTT  | TCGCATATTACATGGCGTAGA  |
|           | 2 | TCTGGCTTCAGAGGGTTCAT   | AAGATTTTTCCGCAGCTTCA   |
| At5g11250 | 1 | ATGCAGGCACCTCTCTACCA   | GCTCAATGATTGCTCCATGTT  |
|           | 2 | CCACCTTTCTGTACCCCTTG   | ATCTTGCCTCTCCCGATTTT   |
| At5g17680 | 1 | AGCGTTCGAGGGATTGTCTA   | CAGACAAGAGAGACGGCTGA   |
|           | 2 | GCCGTCTCTCTTGTCTGGTT   | TGTTTCATGTTGCTTAGGCTCA |
|           | 3 | ATGAGCTGCTTGAGGTGGTT   | TTGGTGATTGAAGCAAGTGG   |
|           | 4 | TGAGCTTCCACGAGGTCTCT   | AATTCTTGCGTCATCAAATGC  |
|           | 5 | ATGCTGATGCTTGTGAGCTG   | TTATCTCCTCGGGTTCGTTG   |
| At5g38850 | 1 | GCTCGAGAAGCTATGGGATG   | AGGGCAAGATACGCTCTCAA   |
| At5g44870 | 1 | CGATACTAAAGTGGGCCAATC  | CATTTCCATTTTCGCGTAGGT  |
| At5g58120 | 1 | GAGCACCTCTGGAGTGGAAC   | CCCAATTTGAAGCAGTTGGT   |
| At5g63020 | 1 | GGCTTCATCTTCCCATTCAA   | GGTGAAGATGCATGATGTGG   |

---

<sup>a</sup>Rank number of each sequenced fragment. Dependent on the length of the LRR region up to five overlapping fragments were sequenced.
