# Supplementary material
Source: PubMed Central journal article supplement (PMC1533970)
Supplement: plntcell_tpc.106.042614_3.pdf [file plntcell_tpc.106.042614_3.pdf]

Supplementary Data

Table 3. Primer information for the amplification of *A. lyrata* LRR region fragments.

| Name      | Fragment <sup>a</sup> | Forward primer (5' to 3') | Reverse primer (5' to 3') |
|-----------|-----------------------|---------------------------|---------------------------|
| At1g27170 | 1                     | ATGTGGGTAAACGCTGAGG       | GCTTCTAAGCTGTGGCAACC      |
|           | 2                     | TGGTTGCCACAGCTTAGAAG      | GAACTCGGAACCTGTTTCAG      |
|           | 3                     | GGTACGCTGCACATCCCT        | CCGAAACTTTCTGGCAACTC      |
|           | 4                     | TGCTCAAGAGGCTTCCTG        | CTGCAAGGGAGTAGTTGGAG      |
| At1g33560 | 1                     | TCTCTTCGGACAACACTACGTC    | CCTTCTTGACCATTTCCCAC      |
| At1g53350 | 1                     | CGAGGAAAAGTTTTGGAAGC      | GAATCGGCATTGGATCT         |
|           | 2                     | GGAGTCGAGGAAAAGTTTTGG     | TCTCCACCTATTACCAGTCTCTCA  |
| At1g56540 | 1                     | TCGAGAAGCTATGGGAAGGA      | CAAGGTCTGCATTTGGAGTG      |
| At1g63730 | 1                     | GGTTTTTCCACCTCAACTAA      | GCACCTCTTCCCTCTAGATA      |
|           | 2                     | GCATTCAGCCCCTTAC          | CCTACGTGCTTCTTGACCCA      |
| At1g63740 | 1                     | AGCATCTACGAGACAAGACGTG    | TCACTCTCCGTGCTTCTTCA      |
| At1g64070 | 1                     | GGATGCATACCCAAGCAAGT      | GCGTGCTTCACAAGAGACTG      |
| At2g16870 | 1                     | CGCACTTGAGTGTTTTAAAGG     | TCTTGTCGAACTCAATATGAAAGAT |
| At4g26090 | 1                     | TTGAGCCTAGCATGGGACAT      | GACGGATGGACTCTCGTGTT      |
| At5g44870 | 1                     | CGATACTAAAGTGGGCCAATC     | CATTTCCATTTGCGGTAGGT      |

<sup>a</sup>Rank number of each sequenced fragment. Dependent on the length of the LRR region up to four overlapping fragments were sequenced.
