# Supplementary material
Source: PubMed Central journal article supplement (PMC1533970)
Supplement: plntcell_tpc.106.042614_4.pdf [file plntcell_tpc.106.042614_4.pdf]

Supplementary Data

Table 4. Regions and number of accessions sequenced.

| Name      | Start position (bp) | End position (bp) | Length (bp) | Accessions sequenced |
|-----------|---------------------|-------------------|-------------|----------------------|
| At1g12290 | 4178828             | 4179706           | 879         | 79                   |
| At1g17600 | 6053261             | 6054635           | 1375        | 70                   |
| At1g27170 | 9436820             | 9438511           | 1692        | 69                   |
| At1g33560 | 12171136            | 12171732          | 597         | 84                   |
| At1g53350 | 19909582            | 19910445          | 864         | 91                   |
| At1g56540 | 21187559            | 21188108          | 550         | 82                   |
| At1g59620 | 21908157            | 21909191          | 1035        | 66                   |
| At1g59780 | 21998323            | 21998337          | 642         | 84                   |
| At1g63730 | 23647608            | 23648310          | 703         | 91                   |
| At1g63740 | 23651090            | 23651791          | 702         | 86                   |
| At1g63750 | 23657491            | 23658039          | 549         | 91                   |
| At1g64070 | 23785991            | 23786545          | 555         | 78                   |
| At1g65850 | 24501006            | 24501623          | 618         | 80                   |
| At2g16870 | 7316074             | 7316622           | 549         | 84                   |
| At3g46530 | 17141909            | 17142488          | 580         | 87                   |
| At3g50950 | 18948770            | 18949663          | 894         | 73                   |
| At4g14370 | 8280764             | 8281464           | 701         | 84                   |
| At4g14610 | 8380918             | 8381955           | 1038        | 88                   |
| At4g26090 | 13226204            | 13226995          | 792         | 92                   |
| At4g33300 | 16051193            | 16052085          | 893         | 81                   |
| At5g04720 | 1362872             | 1363597           | 726         | 87                   |
| At5g11250 | 3588309             | 3589556           | 1248        | 69                   |
| At5g17680 | 5824910             | 5826770           | 1861        | 56                   |
| At5g38850 | 15574542            | 15575088          | 547         | 89                   |
| At5g44870 | 18134361            | 18135041          | 681         | 78                   |
| At5g58120 | 23536891            | 23537439          | 549         | 83                   |
| At5g63020 | 25300706            | 25301629          | 924         | 89                   |
